# Supplementary material for: Analysis of Initial Cell Spreading Using Mechanistic Contact Formulations for a Deformable Cell Model
Source: PLOS journal article supplement (doi:10.1371/journal.pcbi.1003267), 2013-10-17
Supplement: S3 (10.1371/journal.pcbi.1003267.s003) [file journal.pcbi.1003267.s003]

301 Moved Permanently

# Moved Permanently

The document has moved here.

---

Apache Server at www.ploscompbiol.org Port 80
